# Supplementary material for: The Chirality Chain in Valine: How the Configuration at the Cα Position through the OcisC′CαN Torsional System Leads to Distortion of the Planar Group CαC′(Ocis)Otrans to a Flat Tetrahedron
Source: PubMed Central journal article supplement — ChemistryOpen. 2018 Sep 3;7(9):696–700. doi: 10.1002/open.201800137 (PMC6120350; doi:10.1002/open.201800137), 2018-09-03
Supplement: OPEN-7-696-s001.pdf [file OPEN-7-696-s001.pdf]

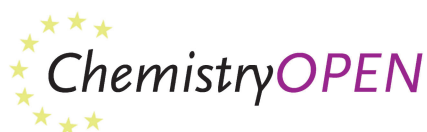

## Supporting Information

© 2018 The Authors. Published by Wiley-VCH Verlag GmbH & Co. KGaA, Weinheim

### **The Chirality Chain in Valine: How the Configuration at the $C_{\alpha}$ Position through the $O_{cis}C'C_{\alpha}N$ Torsional System Leads to Distortion of the Planar Group $C_{\alpha}C'(O_{cis})O_{trans}$ to a Flat Tetrahedron**

Henri Brunner<sup>\*[a]</sup> and Takashi Tsuno<sup>\*[b]</sup>

open\_201800137\_sm\_miscellaneous\_information.pdf

**Table of Contents**

|                                                                                                                              |   |
|------------------------------------------------------------------------------------------------------------------------------|---|
| Table S1. Zwitterionic valine structures, including all the structure determinations of the valine racemates and enantiomers | 3 |
| Table S2. Valine zwitterions protonated at the carboxylic group by strong acids                                              | 4 |
| Table S3. Dipeptides with valine at carboxy and amino end                                                                    | 5 |
| Author Contributions                                                                                                         | 6 |

**Table S1.** Zwitterionic valine structures, including all the structure determinations of the valine racemates and enantiomers

| Entry | CSD symbol <sup>[a]</sup>  | Config.<br>C <sub>α</sub> | Chirality chain                                                       |                                                                                         | Distances               |                             | Bond angles                    |                                     | Comments                                                                 |
|-------|----------------------------|---------------------------|-----------------------------------------------------------------------|-----------------------------------------------------------------------------------------|-------------------------|-----------------------------|--------------------------------|-------------------------------------|--------------------------------------------------------------------------|
|       |                            |                           | O <sub>cis</sub> -C'-<br>C <sub>α</sub> -N<br>rotation<br>angle ψ / ° | O <sub>trans</sub> -C'-C <sub>α</sub> -<br>O <sub>cis</sub><br>pyramidal<br>angle θ / ° | O <sub>cis</sub> -N / Å | O <sub>cis</sub> -C(Pr) / Å | N-C <sub>α</sub> -C'(O)<br>/ ° | (Pr)C-C <sub>α</sub> -<br>C'(O) / ° |                                                                          |
| 1     | LVALIN01(1)                | L                         | -17.48                                                                | -177.78                                                                                 | 2.66                    | 3.39                        | 109.26                         | 112.72                              | enantiomer(1)                                                            |
| 2     | LVALIN05(1)                | L                         | -18.78                                                                | -177.00                                                                                 | 2.65                    | 3.37                        | 109.12                         | 113.22                              | enantiomer(1)                                                            |
| 3     | LVALIN(1)                  | L                         | -19.46                                                                | -177.51                                                                                 | 2.65                    | 3.38                        | 109.55                         | 113.74                              | enantiomer(1)                                                            |
| 4     | VALIDL03                   | L                         | -23.31                                                                | -179.09                                                                                 | 2.67                    | 3.33                        | 110.02                         | 112.47                              | racemate <sup>[b]</sup>                                                  |
| 5     | VALIDL02                   | L                         | -23.48                                                                | -179.09                                                                                 | 2.67                    | 3.33                        | 109.49                         | 112.53                              | racemate <sup>[b]</sup>                                                  |
| 6     | VALIDL                     | L                         | -24.21                                                                | -179.78                                                                                 | 2.67                    | 3.33                        | 109.08                         | 112.96                              | racemate <sup>[b]</sup>                                                  |
| 7     | OXEMEL                     | L                         | -24.63                                                                | -178.47                                                                                 | 2.67                    | 3.32                        | 109.28                         | 111.29                              | enantiomer                                                               |
| 8     | LVALIN01(2)                | L                         | -42.81                                                                | -177.66                                                                                 | 2.76                    | 3.10                        | 109.33                         | 110.48                              | enantiomer(2)                                                            |
| 9     | LVALIN(2)                  | L                         | -43.79                                                                | -178.36                                                                                 | 2.77                    | 3.06                        | 109.14                         | 109.24                              | enantiomer(2)                                                            |
| 10    | LVALIN05(2)                | L                         | -43.88                                                                | -177.52                                                                                 | 2.76                    | 3.09                        | 108.88                         | 111.01                              | enantiomer(2)                                                            |
| 11    | AHEJEC01(1) <sup>[c]</sup> | D                         | 17.55                                                                 | 177.91                                                                                  | 2.66                    | 3.38                        | 109.36                         | 112.76                              | enantiomer(1)                                                            |
| 12    | AHEJEC(1) <sup>[c]</sup>   | D                         | 17.95                                                                 | 177.75                                                                                  | 2.66                    | 3.38                        | 109.31                         | 112.98                              | enantiomer(1)                                                            |
| 13    | AHEJEC02(1) <sup>[c]</sup> | D                         | 18.09                                                                 | 177.88                                                                                  | 2.66                    | 3.38                        | 109.41                         | 113.08                              | enantiomer(1)                                                            |
| 14    | AHEJEC03(1) <sup>[c]</sup> | D                         | 18.36                                                                 | 177.82                                                                                  | 2.66                    | 3.38                        | 109.34                         | 113.03                              | enantiomer(1)                                                            |
| 15    | AHEJEC01(2) <sup>[c]</sup> | D                         | 43.28                                                                 | 177.20                                                                                  | 2.76                    | 3.09                        | 109.19                         | 110.60                              | enantiomer(2)                                                            |
| 16    | AHEJEC(2) <sup>[c]</sup>   | D                         | 43.55                                                                 | 177.22                                                                                  | 2.75                    | 3.09                        | 109.09                         | 110.59                              | enantiomer(2)                                                            |
| 17    | AHEJEC02(2) <sup>[c]</sup> | D                         | 43.80                                                                 | 177.12                                                                                  | 2.75                    | 3.09                        | 109.11                         | 109.91                              | enantiomer(2)                                                            |
| 18    | AHEJEC03(2) <sup>[c]</sup> | D                         | 43.99                                                                 | 177.10                                                                                  | 2.75                    | 3.09                        | 109.23                         | 110.74                              | enantiomer(2)                                                            |
| 19    | QQWEY[1]                   | L                         | 3.49                                                                  | -182.28                                                                                 | 2.61                    | 3.51                        | 108.07                         | 111.73                              | + L-valine-HClO <sub>4</sub><br>adduct                                   |
| 20    | OPEFUL[1]                  | L                         | -5.53                                                                 | -181.00                                                                                 | 2.60                    | 3.51                        | 107.19                         | 116.10                              | + L-valine-HCl<br>adduct                                                 |
| 21    | HAGYEU                     | L                         | -10.60                                                                | -179.86                                                                                 | 2.64                    | 3.60                        | 109.75                         | 111.46                              | + fumaric acid                                                           |
| 22    | EWOZIZ                     | L                         | -10.68                                                                | -180.04                                                                                 | 2.63                    | 3.42                        | 109.56                         | 111.11                              | + fumaric acid                                                           |
| 23    | OCOLID[1]                  | L                         | -10.76                                                                | -179.37                                                                                 | 2.61                    | 3.50                        | 106.74                         | 118.21                              | + valine-HBr adduct                                                      |
| 24    | GUQUJUZ[1](1)              | L                         | -12.95                                                                | -180.76                                                                                 | 2.64                    | 3.40                        | 109.35                         | 111.53                              | + valine-naphtha-<br>lene-1,5-(SO <sub>3</sub> H) <sub>2</sub><br>adduct |
| 25    | GUQUJUZ[1](2)              | L                         | -20.39                                                                | -177.28                                                                                 | 2.64                    | 3.30                        | 107.90                         | 112.64                              | + valine-naphtha-<br>lene-1,5-(SO <sub>3</sub> H) <sub>2</sub><br>adduct |
| 26    | GALPIT                     | L                         | -24.03                                                                | -178.61                                                                                 | 2.67                    | 3.33                        | 109.69                         | 112.73                              | + (R)-PhOCHMe-<br>COOH                                                   |
| 27    | VIKLUX                     | L                         | -24.91                                                                | -178.69                                                                                 | 2.68                    | 3.32                        | 109.39                         | 110.96                              | + fumaric acid                                                           |
| 28    | DUMPEI(1)                  | L                         | -31.03                                                                | -178.36                                                                                 | 2.62                    | 3.27                        | 104.91                         | 109.36                              | + calix[4]resor-<br>cinarene,<br>CF <sub>3</sub> CH <sub>2</sub> OH      |
| 29    | PAHCIL[1]                  | L                         | -32.33                                                                | -179.19                                                                                 | 2.67                    | 3.26                        | 107.73                         | 114.36                              | + valine-trinitro-<br>phenol adduct                                      |
| 30    | GOLVUY                     | L                         | -35.59                                                                | -177.34                                                                                 | 2.69                    | 3.17                        | 108.04                         | 110.44                              | + D-n-BuAA <sup>[d]</sup>                                                |
| 31    | BERQIY                     | L                         | -36.05                                                                | -177.54                                                                                 | 2.70                    | 3.17                        | 107.97                         | 110.68                              | + D-methionine                                                           |
| 32    | BERQEU                     | L                         | -36.55                                                                | -177.49                                                                                 | 2.70                    | 3.16                        | 108.14                         | 110.42                              | + D-n-PrAA <sup>[d]</sup>                                                |
| 33    | BERQAQ                     | L                         | -37.47                                                                | -177.47                                                                                 | 2.70                    | 3.15                        | 107.91                         | 110.39                              | + D-EtAA <sup>[d]</sup>                                                  |
| 34    | LENGIX                     | L                         | -42.16                                                                | -178.37                                                                                 | 2.76                    | 3.10                        | 109.52                         | 110.23                              | + L-isoleucine                                                           |
| 35    | ALIHUA                     | L                         | -42.72                                                                | -177.29                                                                                 | 2.75                    | 3.11                        | 108.87                         | 110.98                              | + L-isoleucine                                                           |
| 36    | DUMPEI(2)                  | L                         | -43.65                                                                | -180.10                                                                                 | 2.77                    | 3.06                        | 110.59                         | 109.59                              | + calix[4]resor-<br>cinarene,<br>CF <sub>3</sub> CH <sub>2</sub> OH      |
| 37    | OHAROF                     | L                         | -53.26                                                                | -171.38                                                                                 | 2.77                    | 3.17                        | 107.55                         | 116.32                              | + Mn cluster                                                             |
| 38    | FITMEA <sup>[c]</sup>      | D                         | 23.91                                                                 | 179.25                                                                                  | 2.68                    | 3.34                        | 109.40                         | 112.69                              | + L-isoleucine                                                           |
| 39    | BERPET <sup>[c]</sup>      | D                         | 24.08                                                                 | 179.27                                                                                  | 2.67                    | 3.33                        | 109.32                         | 110.05                              | + L-leucine                                                              |
| 40    | SONCED <sup>[c]</sup>      | D                         | 25.84                                                                 | 179.48                                                                                  | 2.68                    | 3.31                        | 109.52                         | 112.63                              | + L-phenylalanine                                                        |
|       | Average                    |                           | -27.74                                                                | -178.32                                                                                 | 2.69                    | 3.28                        | 108.86                         | 111.95                              |                                                                          |

<sup>[a]</sup>Parenthesis () indicate independent molecules in the unit cell, while brackets [] differentiate between \*NH<sub>3</sub>CH(Pr)COO<sup>-</sup> and \*NH<sub>3</sub>CH(Pr)COOH. <sup>[b]</sup>Racemates given as L-compounds. <sup>[c]</sup>For average calculation rotation angle and distortion angle inverted. <sup>[d]</sup>AA = amino acid.

**Table S2.** Valine zwitterions protonated at the carboxylic group by strong acids

| Entry                                       | CSD symbol <sup>[a]</sup>  | Chirality chain        |                                                                  |                                                                                      | Distances               |                             | Bond angles                 |                                 | Comments                                                                   |
|---------------------------------------------|----------------------------|------------------------|------------------------------------------------------------------|--------------------------------------------------------------------------------------|-------------------------|-----------------------------|-----------------------------|---------------------------------|----------------------------------------------------------------------------|
|                                             |                            | Config. C <sub>α</sub> | O <sub>cis</sub> -C'-C <sub>α</sub> -N rotation angle $\psi$ / ° | O <sub>trans</sub> -C'-C <sub>α</sub> -O <sub>cis</sub> pyramidal angle $\theta$ / ° | O <sub>cis</sub> -N / Å | O <sub>cis</sub> -C(Pr) / Å | N-C <sub>α</sub> -C'(O) / ° | (Pr)C-C <sub>α</sub> -C'(O) / ° |                                                                            |
| 1                                           | WIHQUA(1)                  | L                      | 1.77                                                             | -182.10                                                                              | 2.66                    | 3.50                        | 107.24                      | 111.77                          | H <sub>2</sub> NbOF <sub>5</sub>                                           |
| 2                                           | BANPOW(1)                  | L                      | 1.11                                                             | -180.32                                                                              | 2.66                    | 3.55                        | 106.84                      | 113.00                          | HClO <sub>4</sub>                                                          |
| 3                                           | BANPOW(2) <sup>[b]</sup>   | L                      | -0.29                                                            | -179.96                                                                              | 2.65                    | 3.53                        | 106.44                      | 113.14                          | HClO <sub>4</sub>                                                          |
| 4                                           | NUZMIG                     | L                      | -0.74                                                            | -181.98                                                                              | 2.67                    | 3.49                        | 110.48                      | 107.86                          | maleic acid                                                                |
| 5                                           | PAHCIL[2]                  | L                      | -1.53                                                            | -179.81                                                                              | 2.66                    | 3.53                        | 107.49                      | 114.99                          | trinitrophenol                                                             |
| 6                                           | BANPOW(3) <sup>[b]</sup>   | L                      | -2.10                                                            | -179.99                                                                              | 2.65                    | 3.52                        | 107.12                      | 113.40                          | HClO <sub>4</sub>                                                          |
| 7                                           | QOQWEY[2]                  | L                      | -1.79                                                            | -178.81                                                                              | 2.61                    | 3.50                        | 106.33                      | 113.75                          | HClO <sub>4</sub> , H <sub>2</sub> O                                       |
| 8                                           | VALHCL10                   | L                      | -3.72                                                            | -182.11                                                                              | 2.68                    | 3.48                        | 108.41                      | 109.80                          | HCl, H <sub>2</sub> O                                                      |
| 9                                           | VALHCL12                   | L                      | -6.11                                                            | -180.33                                                                              | 2.68                    | 3.46                        | 108.07                      | 111.73                          | HCl, H <sub>2</sub> O                                                      |
| 10                                          | VALHCL11                   | L                      | -6.13                                                            | -180.62                                                                              | 2.65                    | 3.50                        | 107.71                      | 112.22                          | HCl, H <sub>2</sub> O                                                      |
| 11                                          | OPEFUL[2]                  | L                      | -8.14                                                            | -181.54                                                                              | 2.65                    | 3.58                        | 107.02                      | 115.20                          | HCl                                                                        |
| 12                                          | GUQJUZ[2](1)               | L                      | -8.86                                                            | -179.57                                                                              | 2.64                    | 3.40                        | 106.81                      | 110.60                          | naphthalene-1,5-sulfonic acid, H <sub>2</sub> O                            |
| 13                                          | XAXHAH(2) <sup>[b]</sup>   | L                      | -9.89                                                            | -183.48                                                                              | 2.48                    | 3.26                        | 109.84                      | 114.09                          | phospho-tungsten acid                                                      |
| 14                                          | VALEHC11                   | L                      | -11.15                                                           | -179.75                                                                              | 2.65                    | 3.45                        | 106.84                      | 114.34                          | HCl                                                                        |
| 15                                          | VALEHC10                   | L                      | -11.17                                                           | -178.65                                                                              | 2.64                    | 3.46                        | 106.23                      | 114.51                          | HCl                                                                        |
| 16                                          | TUZJJI                     | L                      | -11.44                                                           | -177.98                                                                              | 2.65                    | 3.42                        | 107.86                      | 110.89                          | TsOH, H <sub>2</sub> O                                                     |
| 17                                          | LUDHAT                     | L                      | -11.50                                                           | -179.26                                                                              | 2.63                    | 3.45                        | 107.90                      | 111.75                          | H <sub>3</sub> PO <sub>4</sub>                                             |
| 18                                          | OCOLID[2]                  | L                      | -11.60                                                           | -179.81                                                                              | 2.63                    | 3.45                        | 106.69                      | 115.42                          | HBr                                                                        |
| 19                                          | HURXEX(1)                  | L                      | -11.68                                                           | -179.54                                                                              | 2.64                    | 3.44                        | 107.90                      | 113.61                          | H <sub>2</sub> PO <sub>3</sub>                                             |
| 20                                          | HURXEX(2)                  | L                      | -12.11                                                           | -179.99                                                                              | 2.66                    | 3.46                        | 107.88                      | 114.45                          | H <sub>2</sub> PO <sub>3</sub>                                             |
| 21                                          | GUQJUZ[2](2)               | L                      | -13.31                                                           | -178.58                                                                              | 2.63                    | 3.42                        | 109.35                      | 111.53                          | naphthalene-1,5-sulfonic acid, H <sub>2</sub> O                            |
| 22                                          | QURSUR                     | L                      | -15.48                                                           | -178.68                                                                              | 2.65                    | 3.40                        | 106.46                      | 111.39                          | maleic acid                                                                |
| 23                                          | QEMGIZ                     | L                      | -15.54                                                           | -178.85                                                                              | 2.66                    | 3.40                        | 107.16                      | 113.08                          | CF <sub>3</sub> COOH                                                       |
| 24                                          | WIHQUA(2) <sup>[b]</sup>   | L                      | -15.68                                                           | -178.90                                                                              | 2.68                    | 3.42                        | 107.69                      | 113.46                          | H <sub>2</sub> NbOF <sub>5</sub>                                           |
| 25                                          | RAJKUK                     | L                      | -15.83                                                           | -179.68                                                                              | 2.68                    | 3.40                        | 107.27                      | 112.64                          | HCl, Me ester                                                              |
| 26                                          | RUXWIQ(1)                  | L                      | -16.49                                                           | -177.96                                                                              | 2.65                    | 3.35                        | 106.76                      | 110.87                          | H <sub>2</sub> SeO <sub>4</sub> , H <sub>2</sub> O                         |
| 27                                          | DLVALC                     | L                      | -16.82                                                           | -180.16                                                                              | 2.68                    | 3.42                        | 106.72                      | 114.26                          | HCl                                                                        |
| 28                                          | RUXWIQ(2)                  | L                      | -16.99                                                           | -179.64                                                                              | 2.67                    | 3.36                        | 107.69                      | 110.21                          | H <sub>2</sub> SeO <sub>4</sub> , H <sub>2</sub> O                         |
| 29                                          | XAXHAH(1)                  | L                      | -19.57                                                           | -175.92                                                                              | 2.81                    | 3.46                        | 104.06                      | 110.63                          | phospho-tungsten acid                                                      |
| 30                                          | VALNIT01(1)                | L                      | -19.96                                                           | -178.99                                                                              | 2.69                    | 3.38                        | 107.59                      | 113.19                          | HNO <sub>3</sub>                                                           |
| 31                                          | ROKBOI02(1)                | L                      | -20.32                                                           | -179.24                                                                              | 2.70                    | 3.39                        | 107.91                      | 111.38                          | HNO <sub>3</sub>                                                           |
| 32                                          | BANPOW(4)                  | L                      | -20.98                                                           | -177.94                                                                              | 2.69                    | 3.34                        | 107.69                      | 110.13                          | HClO <sub>4</sub>                                                          |
| 33                                          | FACXUD                     | L                      | -22.42                                                           | -178.99                                                                              | 2.68                    | 3.34                        | 107.11                      | 112.46                          | CF <sub>3</sub> COOH                                                       |
| 34                                          | VALNIT01(2)                | L                      | -22.67                                                           | -178.80                                                                              | 2.70                    | 3.37                        | 106.97                      | 113.87                          | HNO <sub>3</sub>                                                           |
| 35                                          | UHEPIG                     | L                      | -23.48                                                           | -178.82                                                                              | 2.68                    | 3.34                        | 107.12                      | 113.85                          | HPO(Onp) <sub>2</sub> , H <sub>2</sub> O                                   |
| 36                                          | HOTXIY                     | L                      | -23.81                                                           | -177.94                                                                              | 2.71                    | 3.31                        | 109.07                      | 111.44                          | RCOOH                                                                      |
| 37                                          | BEZNUR                     | L                      | -23.83                                                           | -177.21                                                                              | 2.68                    | 3.31                        | 106.79                      | 111.06                          | H <sub>2</sub> SiF <sub>6</sub>                                            |
| 38                                          | ROKBOI01(1)                | L                      | -23.83                                                           | -179.57                                                                              | 2.71                    | 3.33                        | 108.40                      | 113.26                          | HNO <sub>3</sub>                                                           |
| 39                                          | WAPQOV                     | L                      | -24.91                                                           | -178.38                                                                              | 2.74                    | 3.35                        | 108.10                      | 112.62                          | cinnamic acid, Me ester                                                    |
| 40                                          | DUMZOB                     | L                      | -25.00                                                           | -179.10                                                                              | 2.71                    | 3.33                        | 107.07                      | 113.47                          | HCl, Bn ester                                                              |
| 41                                          | RUXWIQ(3)                  | L                      | -25.07                                                           | -178.27                                                                              | 2.71                    | 3.32                        | 107.36                      | 111.61                          | H <sub>2</sub> SeO <sub>4</sub>                                            |
| 42                                          | ROKBOI(1)                  | L                      | -25.24                                                           | -178.57                                                                              | 2.72                    | 3.32                        | 107.34                      | 113.67                          | HNO <sub>3</sub>                                                           |
| 43                                          | RUXWIQ(4)                  | L                      | -25.96                                                           | -176.98                                                                              | 2.69                    | 3.31                        | 107.21                      | 112.75                          | H <sub>2</sub> SeO <sub>4</sub>                                            |
| 44                                          | ROKBOI02(2)                | L                      | -27.96                                                           | -178.36                                                                              | 2.77                    | 3.30                        | 109.13                      | 110.18                          | HNO <sub>3</sub>                                                           |
| 45                                          | ABEHOF                     | L                      | -28.23                                                           | -178.61                                                                              | 2.69                    | 3.26                        | 107.63                      | 112.06                          | trinitrophenol                                                             |
| 46                                          | WAPQIP                     | L                      | -30.67                                                           | -181.32                                                                              | 2.74                    | 3.32                        | 107.59                      | 113.31                          | 4-MeC <sub>6</sub> H <sub>4</sub> -CH=CH-OOH, CHCl <sub>3</sub> , Me ester |
| 47                                          | ROKBOI01(2)                | L                      | -31.78                                                           | -180.23                                                                              | 2.76                    | 3.24                        | 109.14                      | 113.41                          | HNO <sub>3</sub>                                                           |
| 48                                          | ROKBOI(2)                  | L                      | -32.49                                                           | -179.22                                                                              | 2.76                    | 3.24                        | 108.63                      | 109.72                          | HNO <sub>3</sub>                                                           |
| 49                                          | VALNIT01(3) <sup>[b]</sup> | L                      | -32.62                                                           | -178.57                                                                              | 2.73                    | 3.21                        | 107.59                      | 110.14                          | HNO <sub>3</sub>                                                           |
| 50                                          | VALNIT01(4) <sup>[b]</sup> | L                      | -33.03                                                           | -178.47                                                                              | 2.72                    | 3.22                        | 106.88                      | 110.81                          | HNO <sub>3</sub>                                                           |
| 51                                          | ROKBOI02(3)                | L                      | -33.74                                                           | -178.21                                                                              | 2.74                    | 3.22                        | 107.70                      | 110.95                          | HNO <sub>3</sub>                                                           |
| 52                                          | ROKBOI02(4)                | L                      | -43.91                                                           | -176.89                                                                              | 2.82                    | 3.10                        | 108.74                      | 108.98                          | HNO <sub>3</sub>                                                           |
| 53                                          | HABXAK <sup>[c]</sup>      | D                      | 17.65                                                            | 179.59                                                                               | 2.67                    | 3.02                        | 107.20                      | 113.32                          | HCl, Me ester                                                              |
| 54                                          | HOSMAE <sup>[c]</sup>      | D                      | 20.90                                                            | 176.81                                                                               | 2.62                    | 3.32                        | 110.37                      | 111.01                          | RCOOH                                                                      |
| Valine zwitterions coordinated in complexes |                            |                        |                                                                  |                                                                                      |                         |                             |                             |                                 |                                                                            |
| 55                                          | ESAPET(1)                  | L                      | -12.29                                                           | -182.91                                                                              | 2.64                    | 3.41                        | 110.43                      | 114.18                          | H <sub>2</sub> PbO <sub>3</sub> , 2HNO <sub>3</sub> , H <sub>2</sub> O     |
| 56                                          | ESAPET01(1)                | L                      | -14.91                                                           | -179.54                                                                              | 2.65                    | 3.40                        | 110.26                      | 112.59                          | H <sub>2</sub> PbO <sub>3</sub> , 2HNO <sub>3</sub> , H <sub>2</sub> O     |
| 57                                          | ACETUX                     | L                      | -19.43                                                           | -181.01                                                                              | 2.55                    | 3.30                        | 107.94                      | 112.27                          | ZnCl <sub>2</sub>                                                          |
| 58                                          | OHAROF <sup>[b]</sup>      | L                      | -23.53                                                           | -176.46                                                                              | 2.57                    | 3.31                        | 107.28                      | 113.48                          | Mn cluster                                                                 |
| 59                                          | DIZXUH(1)                  | L                      | -23.69                                                           | -178.69                                                                              | 2.52                    | 3.30                        | 107.18                      | 114.50                          | FeBr <sub>2</sub>                                                          |
| 60                                          | ESAPET02(1)                | L                      | -27.29                                                           | -171.61                                                                              | 2.69                    | 3.29                        | 108.64                      | 115.03                          | H <sub>2</sub> PbO <sub>3</sub> , 2HNO <sub>3</sub> , H <sub>2</sub> O     |
| 61                                          | ESAPET01(2)                | L                      | -29.13                                                           | -177.97                                                                              | 2.69                    | 3.28                        | 107.10                      | 111.90                          | H <sub>2</sub> PbO <sub>3</sub> , 2HNO <sub>3</sub> , H <sub>2</sub> O     |
| 62                                          | ESAPET02(2)                | L                      | -29.14                                                           | -177.24                                                                              | 2.70                    | 3.27                        | 108.35                      | 111.28                          | H <sub>2</sub> PbO <sub>3</sub>                                            |

|    |                       |   |        |         |      |      |        |        |                                                                           |
|----|-----------------------|---|--------|---------|------|------|--------|--------|---------------------------------------------------------------------------|
| 63 | ESAPET(2)             | L | -32.97 | -175.39 | 2.69 | 3.28 | 108.91 | 113.31 | 2HNO <sub>3</sub> , H <sub>2</sub> O                                      |
| 64 | DIZXUH(2)             | L | -33.48 | -178.95 | 2.56 | 3.17 | 107.43 | 112.55 | H <sub>2</sub> PbO <sub>3</sub> ,<br>2HNO <sub>3</sub> , H <sub>2</sub> O |
| 65 | VALCAC <sup>[b]</sup> | L | -35.46 | -179.94 | 2.67 | 3.17 | 105.99 | 110.48 | FeBr <sub>2</sub>                                                         |
|    | Average               |   | -18.69 | -179.06 | 2.67 | 3.36 | 107.69 | 112.38 | CaCl <sub>2</sub> (H <sub>2</sub> O)                                      |

<sup>[a]</sup>Parenthesis ( ) indicate independent molecules in the unit cell, while brackets [ ] differentiate between \*NH<sub>3</sub>CH(Pr)COO<sup>-</sup> and \*NH<sub>3</sub>CH(Pr)COOH. <sup>[b]</sup>Racemates given as L-compounds. <sup>[c]</sup>For average calculation rotation angle and distortion angle inverted.

**Table S3.** Dipeptides with valine at carboxy and amino end

| Entry                 | CSD symbol <sup>[a]</sup> | Dipeptide   | Chirality chain        |                                                             |                                                                                                    | Distances               |                              | Bond angles                 |                                 |
|-----------------------|---------------------------|-------------|------------------------|-------------------------------------------------------------|----------------------------------------------------------------------------------------------------|-------------------------|------------------------------|-----------------------------|---------------------------------|
|                       |                           |             | Config. C <sub>α</sub> | O <sub>cis</sub> -C'-C <sub>α</sub> -N rotation angle ψ / ° | O <sub>trans</sub> (N <sub>amide</sub> )-C'-C <sub>α</sub> -O <sub>cis</sub> pyramidal angle θ / ° | O <sub>cis</sub> -N / Å | O <sub>cis</sub> -C'(Pr) / Å | N-C <sub>α</sub> -C'(O) / ° | (Pr)C-C <sub>α</sub> -C'(O) / ° |
| Valine at carboxy end |                           |             |                        |                                                             |                                                                                                    |                         |                              |                             |                                 |
| 1                     | FOBXAW(1)                 | Asn-Val     | L                      | 6.45                                                        | -180.79                                                                                            | 2.67                    | 3.58                         | 112.54                      | 111.67                          |
| 2                     | XUDWAU(1)                 | Ala-Val     | L                      | -3.09                                                       | -202.39                                                                                            | 2.72                    | 3.47                         | 107.75                      | 115.50                          |
| 3                     | LACCAT                    | Trp-Val     | L                      | -8.88                                                       | -179.77                                                                                            | 2.65                    | 3.44                         | 110.19                      | 111.46                          |
| 4                     | NAFZID(1)                 | Leu-Val     | L                      | -14.30                                                      | -178.35                                                                                            | 2.73                    | 3.40                         | 109.41                      | 111.06                          |
| 5                     | TIPTUH                    | Glu-Val     | L                      | -14.56                                                      | -180.14                                                                                            | 2.70                    | 3.42                         | 111.21                      | 112.49                          |
| 6                     | XUDWAU(2)                 | Ala-Val     | L                      | -16.59                                                      | -180.05                                                                                            | 2.72                    | 3.39                         | 110.37                      | 111.01                          |
| 7                     | EFUCIS                    | Ala-Val     | L                      | -19.20                                                      | -187.39                                                                                            | 2.62                    | 3.43                         | 114.11                      | 115.91                          |
| 8                     | NAFZID(2)                 | Leu-Val     | L                      | -24.39                                                      | -178.51                                                                                            | 2.70                    | 3.35                         | 112.71                      | 111.15                          |
| 9                     | BIBVOX                    | Pro-Val     | L                      | -24.39                                                      | -180.91                                                                                            | 2.74                    | 3.32                         | 112.60                      | 106.11                          |
| 10                    | EYIVAJ(1)                 | Ser-Val     | L                      | -24.66                                                      | -180.27                                                                                            | 2.70                    | 3.34                         | 112.93                      | 108.81                          |
| 11                    | HEGMAI                    | Ile-Val     | L                      | -25.15                                                      | -177.08                                                                                            | 2.77                    | 3.29                         | 109.38                      | 111.56                          |
| 12                    | AQASAM                    | Ile-Val     | L                      | -25.33                                                      | -176.87                                                                                            | 2.76                    | 3.31                         | 109.95                      | 111.46                          |
| 13                    | AQASIU                    | Val-Val     | L                      | -26.09                                                      | -177.57                                                                                            | 2.76                    | 3.29                         | 109.46                      | 111.49                          |
| 14                    | HEGLUB                    | Val-Val     | L                      | -26.26                                                      | -177.41                                                                                            | 2.74                    | 3.28                         | 109.69                      | 112.02                          |
| 15                    | WEVWOK(2)                 | Gly-Val     | L                      | -26.28                                                      | -178.91                                                                                            | 2.71                    | 3.31                         | 112.47                      | 109.47                          |
| 16                    | WEVWOK(5)                 | Gly-Val     | L                      | -27.45                                                      | -179.88                                                                                            | 2.72                    | 3.30                         | 112.89                      | 108.77                          |
| 17                    | SEYWAU                    | Lys-Val HCl | L                      | -27.69                                                      | -180.56                                                                                            | 2.70                    | 3.26                         | 110.43                      | 108.25                          |
| 18                    | SEGYOS                    | Arg-Val     | L                      | -28.86                                                      | -177.47                                                                                            | 2.70                    | 3.28                         | 111.62                      | 113.35                          |
| 19                    | WEVWOK(6)                 | Gly-Val     | L                      | -29.28                                                      | -178.82                                                                                            | 2.70                    | 3.26                         | 111.75                      | 109.40                          |
| 20                    | WEVWOK(1)                 | Gly-Val     | L                      | -30.50                                                      | -179.78                                                                                            | 2.73                    | 3.26                         | 112.46                      | 108.75                          |
| 21                    | WEVWOK(3)                 | Gly-Val     | L                      | -31.27                                                      | -177.16                                                                                            | 2.69                    | 3.24                         | 112.41                      | 109.05                          |
| 22                    | NAFZID(3)                 | Leu-Val     | L                      | -32.84                                                      | -181.45                                                                                            | 2.67                    | 3.32                         | 114.75                      | 111.18                          |
| 23                    | XUDVOH04                  | Ala-Val     | L                      | -34.93                                                      | -176.51                                                                                            | 2.74                    | 3.21                         | 110.97                      | 110.82                          |
| 24                    | WEVWOK(4)                 | Gly-Val     | L                      | -35.84                                                      | -177.59                                                                                            | 2.72                    | 3.19                         | 111.75                      | 108.99                          |
| 25                    | WEVWOK(7)                 | Gly-Val     | L                      | -35.87                                                      | -178.08                                                                                            | 2.70                    | 3.16                         | 110.53                      | 109.58                          |
| 26                    | XUDVOH01                  | Ala-Val     | L                      | -36.81                                                      | -175.68                                                                                            | 2.75                    | 3.21                         | 111.91                      | 111.91                          |
| 27                    | XUDWAU(3)                 | Ala-Val     | L                      | -39.07                                                      | -179.74                                                                                            | 2.75                    | 3.18                         | 110.49                      | 110.64                          |
| 28                    | FOBXAW(2)                 | Asn-Val     | L                      | -41.54                                                      | -178.15                                                                                            | 2.84                    | 3.21                         | 111.85                      | 110.43                          |
| 29                    | BEQJEN                    | Try-Val     | L                      | -42.70                                                      | -177.43                                                                                            | 2.82                    | 3.15                         | 111.21                      | 111.22                          |
| 30                    | EPATUM                    | Ala-Val     | L                      | -42.80                                                      | -173.89                                                                                            | 2.76                    | 3.13                         | 110.86                      | 111.32                          |
| 31                    | XUDVUN                    | Ala-Val     | L                      | -42.82                                                      | -179.96                                                                                            | 2.77                    | 3.11                         | 109.43                      | 111.46                          |
| 32                    | XUDWAU(4)                 | Ala-Val     | L                      | -44.30                                                      | -179.35                                                                                            | 2.77                    | 3.07                         | 108.32                      | 111.11                          |
| 33                    | XUDVOH                    | Ala-Val     | L                      | -44.60                                                      | -176.43                                                                                            | 2.77                    | 3.11                         | 110.50                      | 111.26                          |
| 34                    | XUDVIB                    | Ala-Val     | L                      | -45.23                                                      | -176.33                                                                                            | 2.76                    | 3.09                         | 110.40                      | 111.34                          |
| 35                    | CIHNUC                    | Tyr-Val     | L                      | -45.49                                                      | -177.97                                                                                            | 2.82                    | 3.11                         | 109.91                      | 110.37                          |
| 36                    | NAFZID(4)                 | Leu-Val     | L                      | -46.51                                                      | -177.28                                                                                            | 2.79                    | 3.08                         | 110.18                      | 110.32                          |
| 37                    | XUDVOH05                  | Ala-Val     | L                      | -48.25                                                      | -174.91                                                                                            | 2.78                    | 3.07                         | 111.45                      | 111.27                          |
| 38                    | FOBXAW(3)                 | Asn-Val     | L                      | -48.89                                                      | -178.64                                                                                            | 2.76                    | 3.08                         | 111.59                      | 111.08                          |
| 39                    | SUWL0L(3)                 | Leu-Val     | L                      | -54.26                                                      | -179.77                                                                                            | 2.81                    | 3.01                         | 110.76                      | 109.20                          |
| 40                    | SUWL0L(1)                 | Leu-Val     | L                      | -54.83                                                      | -179.63                                                                                            | 2.81                    | 3.02                         | 111.44                      | 109.83                          |
| 41                    | SUWL0L(4)                 | Leu-Val     | L                      | -55.25                                                      | -178.05                                                                                            | 2.90                    | 3.08                         | 111.77                      | 110.41                          |
| 42                    | SUWL0L(2)                 | Leu-Val     | L                      | -56.09                                                      | -178.60                                                                                            | 2.91                    | 3.09                         | 112.22                      | 111.14                          |
| 43                    | SUWLIF                    | Leu-Val     | L                      | -64.79                                                      | -180.65                                                                                            | 2.88                    | 2.95                         | 112.04                      | 110.51                          |
| 44                    | JUCSEF01                  | Leu-Val     | L                      | -71.60                                                      | -184.02                                                                                            | 3.02                    | 2.86                         | 108.95                      | 110.51                          |
| Valine at amino end   |                           |             |                        |                                                             |                                                                                                    |                         |                              |                             |                                 |
| 45                    | MOBYEH(1) <sup>[b]</sup>  | Val-Phe     | L                      | 135.42 <sup>[c]</sup>                                       | -175.49 <sup>[c]</sup>                                                                             | -                       | -                            | 109.71                      | 111.41                          |
| 46                    | MOBYEH(2) <sup>[b]</sup>  | Val-Phe     | L                      | 133.22 <sup>[c]</sup>                                       | -177.17 <sup>[c]</sup>                                                                             | -                       | -                            | 109.89                      | 111.68                          |
| 47                    | MOBYEH(3) <sup>[b]</sup>  | Val-Phe     | L                      | 130.25 <sup>[c]</sup>                                       | -177.58 <sup>[c]</sup>                                                                             | -                       | -                            | 110.14                      | 112.11                          |
| 48                    | MOBYEH(4) <sup>[b]</sup>  | Val-Phe     | L                      | 125.42 <sup>[c]</sup>                                       | -177.57 <sup>[c]</sup>                                                                             | -                       | -                            | 109.61                      | 110.71                          |
| 49                    | NAYZET(1)                 | Val-Ala     | L                      | -10.91                                                      | -178.03                                                                                            | 2.61                    | 3.44                         | 106.50                      | 112.19                          |
| 50                    | AQASEQ                    | Val-Ile     | L                      | -13.58                                                      | -180.89                                                                                            | 2.59                    | 3.44                         | 105.03                      | 113.04                          |
| 51                    | AQASIU                    | Val-Val     | L                      | -13.83                                                      | -180.11                                                                                            | 2.59                    | 3.45                         | 105.46                      | 113.97                          |
| 52                    | HEGMEM01                  | Val-Ile     | L                      | -14.44                                                      | -180.24                                                                                            | 2.60                    | 3.43                         | 105.78                      | 113.42                          |
| 53                    | HEGMEM                    | Val-Ile     | L                      | -14.97                                                      | -179.98                                                                                            | 2.59                    | 3.44                         | 105.67                      | 114.19                          |
| 54                    | HEGLUB                    | Val-Val     | L                      | -15.11                                                      | -179.73                                                                                            | 2.74                    | 3.28                         | 105.46                      | 113.81                          |
| 55                    | WIRYEB02                  | Val-Ala     | L                      | -16.55                                                      | -178.42                                                                                            | 2.59                    | 3.38                         | 105.60                      | 113.02                          |
| 56                    | WIRYEB                    | Val-Ala     | L                      | -17.10                                                      | -180.00                                                                                            | 2.59                    | 3.37                         | 105.99                      | 112.55                          |
| 57                    | NAYZET(2)                 | Val-Ala     | L                      | -18.17                                                      | -178.31                                                                                            | 2.64                    | 3.38                         | 107.08                      | 111.58                          |
| 58                    | NAYZIX                    | Val-Ala     | L                      | -18.85                                                      | -178.32                                                                                            | 2.59                    | 3.37                         | 105.40                      | 112.70                          |
| 59                    | CAZGOA(1)                 | Val-Ser     | L                      | -19.65                                                      | -179.47                                                                                            | 2.58                    | 3.37                         | 105.38                      | 113.44                          |
| 60                    | GAZGOA01(1)               | Val-Ser     | L                      | -20.83                                                      | -178.58                                                                                            | 2.59                    | 3.36                         | 105.22                      | 113.72                          |

|    |             |         |   |        |         |      |      |        |        |
|----|-------------|---------|---|--------|---------|------|------|--------|--------|
| 61 | GAZGOA01(2) | Val-Ser | L | -20.90 | -178.48 | 2.63 | 3.36 | 106.37 | 111.98 |
| 62 | CAZGOA(2)   | Val-Ser | L | -21.50 | -178.23 | 2.64 | 3.36 | 106.17 | 112.27 |
| 63 | MOBYEH(5)   | Val-Phe | L | -21.63 | -177.87 | 2.67 | 3.34 | 106.81 | 110.99 |
| 64 | GAZGOA01(3) | Val-Ser | L | -22.23 | -178.01 | 2.63 | 3.35 | 105.87 | 111.91 |
| 65 | CAZGOA(3)   | Val-Ser | L | -22.73 | -177.57 | 2.64 | 3.35 | 105.85 | 111.96 |
| 66 | AQASIU      | Val-Val | L | -26.13 | -179.89 | 2.59 | 3.44 | 112.09 | 109.52 |
| 67 | MOBYAD      | Val-Phe | L | -31.15 | -177.50 | 2.70 | 3.27 | 106.75 | 112.35 |
| 68 | NAYZET(3)   | Val-Ala | L | -35.79 | -178.33 | 2.71 | 3.25 | 106.60 | 112.26 |
| 69 | MOBYEH(6)   | Val-Phe | L | -37.29 | -178.08 | 2.70 | 3.21 | 106.37 | 112.70 |
| 70 | TIPTOB      | Val-Gln | L | -40.11 | -178.33 | 2.74 | 3.15 | 106.90 | 110.95 |
| 71 | MOBYEH(7)   | Val-Phe | L | -42.14 | -181.45 | 2.70 | 3.13 | 105.25 | 111.39 |
| 72 | FOBLUE      | Val-Ser | L | -49.09 | -176.76 | 2.84 | 3.08 | 108.37 | 110.10 |
| 73 | COCGIK(1)   | Val-Phe | L | -50.41 | -177.21 | 2.83 | 3.05 | 107.45 | 110.33 |
| 74 | COCGIK(2)   | Val-Phe | L | -50.74 | -178.32 | 2.84 | 3.05 | 107.58 | 110.33 |
| 75 | CIJGUX      | Val-Glu | L | -54.77 | -180.70 | 2.86 | 3.05 | 107.66 | 111.04 |
| 76 | MOBYEH(8)   | Val-Phe | L | -55.34 | -178.74 | 2.93 | 3.08 | 109.31 | 111.55 |
| 77 | COCGIK(3)   | Val-Phe | L | -60.53 | -177.15 | 2.91 | 3.00 | 107.72 | 111.41 |
| 78 | COCGIK(4)   | Val-Phe | L | -61.36 | -176.71 | 2.92 | 3.00 | 107.72 | 111.50 |
|    | Average     |         |   | -32.57 | -179.08 | 2.73 | 3.24 | 109.31 | 111.31 |

<sup>[a]</sup>Parenthesis ( ) indicate independent molecules in the unit cell. <sup>[b]</sup>Compound excluded for average calculation. <sup>[c]</sup>Syn-conformation, rotation angle  $\psi$ : O<sub>trans</sub>-C'-C<sub>α</sub>-N, pyramidalization angle  $\theta$ : O<sub>trans</sub>-C'-C<sub>α</sub>-N.

## Author Contributions

H.B. planned and guided the research project. H.B. and T.T. carried out the experimental work, analyzed the results participated in writing the manuscript.
